# Supplementary material
Source: publisher figshare collection journal article supplement (https://diabetesjournals.figshare.com/articles/dataset/_/19467635)
Supplement: Supplementary file 1 [file 1]

## Supplemental Data Appendix

Austria, Vienna: University kinderlinik Wien, Belgium, Leuven: University Hospital Leuven (UZ Leuven), Bulgaria, Sofia: University Paediatric Hospital, Bulgaria, Varna: University Hospital St. Marina, Croatia, Zagreb: University Clinical Hospital Center Sestre milosrdnice, Croatia, Zagreb: University Hospital Zagreb, Czech Republic, Prague: Charles University Prague, Czech Republic, Prague: University Hospital Motol Prague, Denmark, Aarhus: University of Aarhus, Denmark, Herlev: Herlev University Hospital, England, Birmingham: Birmingham Childrens hospital, England, Leeds: The Leeds Paediatric Diabetes at the Leeds Childrens Hospital, England, London: Barts and the London NHS Trust, England, Mansfield: Sherwood Forest Hospital, France, Angers: University Hospital Angers, France, Bordeaux: Centre Hospitalier Universitaire de Bordeaux, France, Paris: Hopital Necker Enfants Malades, Germany, Hannover: Kinderkrankenhaus Auf der Bult, Germany, Leverkusen: Klinikum Leverkusen – Kinderklinik, Greece, Athens: A. Department of Pediatrics, Aghia Sophia Children's Hospital, Athens University, Greece, Athens: Diabetes Center A' Department of Pediatrics P&A Kyriakou Children's Hospital, Greece, Thessaloniki: AHEPA University Hospital, 2nd Department of Paediatrics, Aristotle University of Thessaloniki, Greece, Thessaloniki: Hippokration Hospital of Thessaloniki, Hungary, Budapest: Semmelweis University, Ireland, Cork: Cork University Hospital, Ireland, Dublin: Our Ladys Children's Hospital, Ireland, Limerick: University of Limerick, Italy, Ancona: Salesi University Hospital, Italy, Florence: Meyer Children Hospital, Italy, Mailand: Ospedale San Raffaele, Italy, Rom: Bambino Gesù Children's Hospital, Italy, Turin: Centro Diabetologia Pediatrica, Italy, Verona: Universita di Verona, Latvia, Riga: Children clinical University Hospital, Lithuania, Kaunas: Hospital of LUHS Kauno Klinikos, Luxembourg, Centre Hospitalier de Luxembourg, Netherlands, Rotterdam: Diabeter Nederland, Norway, Haugesund: Helse Fonna, Poland, Katowicze: Medical University of Silesia, Poland, Opole: USK Opole, Poland, Rzeszow: University of Rzeszow, Pediatric Endocrinology and Diabetes, Poland, Warsaw: Medical University of Warsaw, Poland, Warsaw: The Institute of Diabetology, Portugal, Coimbra: Hospital Pediatrico de Coimbra, Portugal, Lisbon, Estafania: Hospital Dona Estefania, Portugal, Lisbon: APDP-Portuguese Diabetes Association, Portugal, Porto: Centro Hospitalar S. Joao, Romania, Bucharest: Diabetes Nutrition and Metabolic Diseases Clinic DiabNutriMed, Romania, Bucharest: Elias University Emergency Hospital, Romania, Buzias: Clinical Center Cristian Serban, Serbia, Belgrade: Institute for Mother and Child Healthcare, Slovenia, Ljubljana: University Childrens Hospital, Spain, Barakaldo: Hospital Universitario Cruces, Spain, Barcelona: Hospital Sant Joan de Deu, Sweden, Gothenburg: The Queen Silvia Childrens Hospital, Sweden, Uddevalla: Uddevalla Childrens Hospital, Australia, Geelong: Granada Medical Centre, Australia, Newcastle: John Hunter Childrens Hospital, Australia, Perth: Princess Margaret Hospital for Children, Australia, Queensland: South East Queensland Private Practice Group, Australia, Woolloongabba: Queensland Paediatric Endocrinology, New Zealand, Auckland: Auckland Starship Hospital, New Zealand, Christchurch: University of Otago and Canterbury District Health Board, Argentina, Buenos

Aires: Hospital Juan P. Garrahan, Brasil, Curitiba: Centro de Diabetes Curitiba,  
 Chile, San Felipe: Hospital San Camilo, Costa Rica, San Jose: National Childrens  
 Hospital, Hospital CIMA, Ecuador, Cuenca: Fundacion Los Fresnos Casa de la  
 Diabetes, Ecuador, Quito: Fundacion Diabetes Juvenil Ecuador, Haiti, Port-Au-  
 Prince: Fondation Hatienne de Diabete, Canada, Calgary: Alberta Health  
 Services, Canada, Markham: Markham Stouffville Hospital, Canada, Sherbrooke:  
 Sherbrooke University, Canada, Vancouver: British Columbia Childrens Hospital,  
 USA, Boston: Boston Childrens Hospital, USA, Cincinnati: Cincinnati Childrens,  
 USA, Denver Colorado: Barbara Davis Center, USA, Stanford: Lucile Packard  
 Children's Hospital, Bangladesh, Dhaka: BIRDEM, Diabetic Association of  
 Bangladesh, Congo Brazzaville, Pointe-Noire: General Hospital Adolphe Sice,  
 Egypt, Cairo: Ain Shams University, Egypt, Cairo: Diabetes & Neuropathy Clinic,  
 India, Ahmedabad: Swasthya Diabetes Care, India, Ahmedabad Bareja:  
 Rudraksha Institute of Medical Sciences, India, Ahmedabad: Arogyam Health  
 Care, India, Ahmedabad: Diacare Clinic, India, Ahmedabad: Medilink Hospital &  
 Research Center, India, Aurangabad: Sarda centre for diabetes and self-care, ,  
 India, Belgaum: KLE Universitys Jawaharlal Nehru Medical College, India,  
 Chennai: MV Diabetes center, India, Coimbatore: PSG institute of medical  
 sciences, India, Jaipur: Galaxy Speciality Center, India, Kanpur: Center for  
 Diabetes & Endocrine Diseases, India, Kota Rajasthan: Ramchandani Diabetes  
 Care and Research Centre, India, Mumbai: Conquer Diabetes, India, Nagpur:  
 Diabetes Care & reserarch centre, India, Sangli: GROW KIDS ENDOCRINE  
 CLINIC SANGLI, India, Trivandrum: Jothydevs Diabetes And Research Centre,  
 Iran, Shiraz: Shiraz University of Medical Sciences, Israel, Petah: Schneider  
 Childrens Medical Center of Israel, Endocrinology, Japan, Osaka: Department of  
 Pediatrics Osaka City University Graduate School, Korea, Seongnam: Seoul  
 National University Bundang Hospital, Kuwait, Kuwait City: Dasman Institute,  
 Maldives, Male: Diabetes Society of Maldives, Mali, Bamako: NGO Santu Diabète  
 / Hopital du Mali, Mauritius, Vacoas: T1Diams, Morocco, Rabat: Children's  
 Hospital – Unit Of Pediatric Diabetology, Nepal, Butwal: Siddharta Children &  
 Women Hospital, Pakistan, Lahore: WeCARE MEDICAL CENTRE, Tanzania,  
 Daressalam: Muhimbili National Hospital, Turkey, Duzce: University of  
 Duzce, Department of Pediatric Endocrinology, Turkey, Ege University Faculty of  
 Medicine
