# Supplementary material
Source: publisher figshare collection journal article supplement (https://diabetesjournals.figshare.com/articles/dataset/_/19467635)
Supplement: Supplementary file 2 [file 1]

## Supplemental files

### The importance of office blood pressure measurement frequency and methodology in evaluating the prevalence of hypertension in children and adolescents with type 1 diabetes: The SWEET international database

**Short title:** Hypertension in pediatric type 1 diabetes

Andriani Vazeou<sup>1</sup>, Sascha R. Tittel<sup>2,3</sup>, Niels H Birkebaek<sup>4</sup>, Olga Kordonouri<sup>5</sup>, Violeta Iotova<sup>6</sup>, Barbara Piccini<sup>7</sup>, Banshi Saboo<sup>8</sup>, Auste Pundziute Lyckå<sup>9</sup>, Sebastian Seget<sup>10</sup>, David M Maahs<sup>11</sup>, George Stergiou<sup>12</sup>

<sup>1</sup> Diabetes Center, A' Department of Pediatrics, P&A Kyriakou Children's Hospitals, Athens, Greece.

<sup>2</sup> Institute of Epidemiology and Medical Biometry, Central Institute for Biomedical Technology (ZIBMT), Ulm University, Ulm, Germany.

<sup>3</sup> German Center for Diabetes Research (DZD), Munich-Neuherberg, Germany

<sup>4</sup> Department of Pediatrics and Steno Diabetes Center Aarhus, Aarhus University Hospital, Aarhus, Denmark.

<sup>5</sup> Children's Hospital AUF DER BULT, Hannover Medical School, Hannover, Germany.

<sup>6</sup> Department of Pediatrics, Medical University, Varna, Bulgaria.

<sup>7</sup> Regional Center for Pediatric Diabetes, Meyer University Children's Hospital, Florence, Italy.

<sup>8</sup> Diacare- Diabetes Care and Hormone clinic, Ahmedabad, Gujarat, India

<sup>9</sup> Queen Silvia Childrens Hospital, Sahlgrenska University Hospital and Department of Pediatrics, Institute for Clinical Sciences, Sahlgrenska Academy, University of Gothenburg, Sweden

<sup>10</sup> Department of Children's Diabetology, Medical University of Silesia, Katowice, Poland.

<sup>11</sup> Department of Pediatrics and Stanford Diabetes Research Center, Stanford, CA, USA.

<sup>12</sup> Hypertension Center STRIDE-7, National and Kapodistrian University of Athens, School of Medicine, Third Department of Medicine, Sotiria Hospital, Athens, Greece.

**Correspondence:** Andriani Vazeou, MD  
Pediatrician - Diabetologist  
Director Diabetes Centre  
A' Department of Pediatrics  
P&A Kyriakou Children's Hospital  
[agerasim@gmail.com](mailto:agerasim@gmail.com)

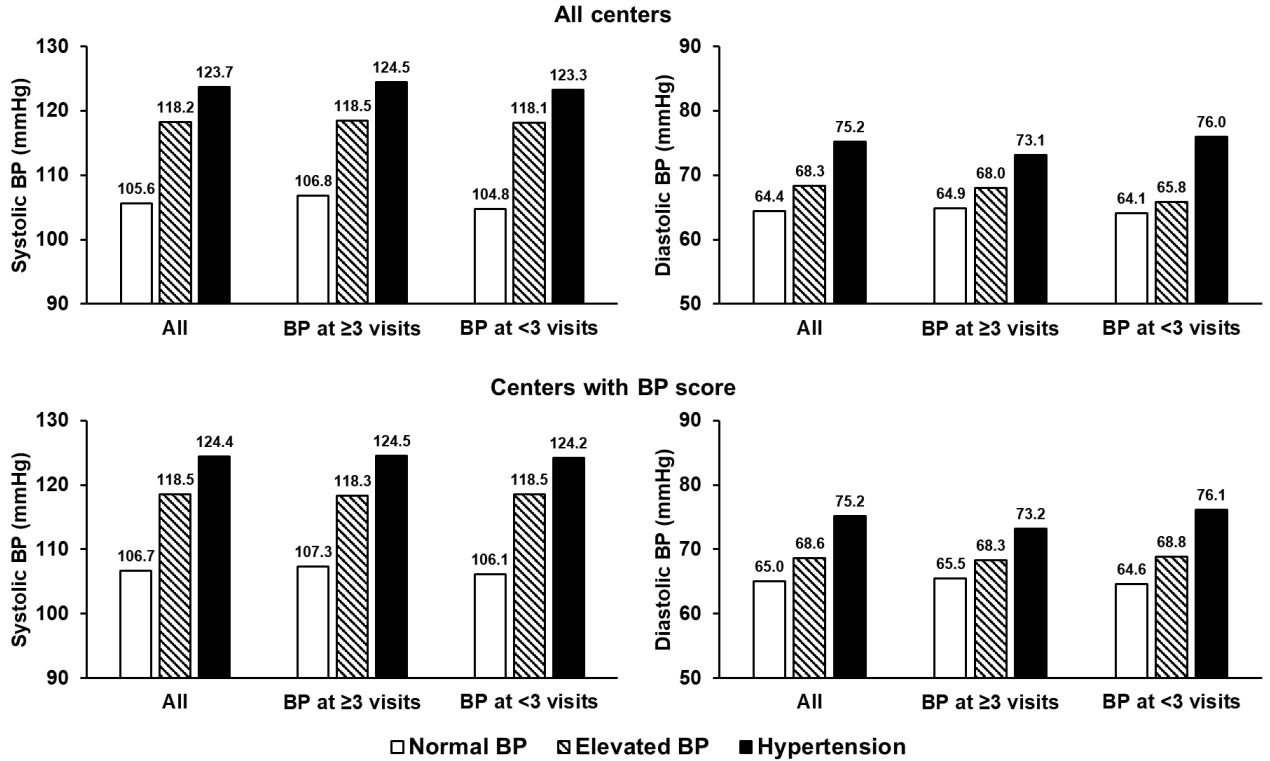

**Supplemental Figure S1.** Median systolic and diastolic BP: In all centers (Cohort A), in the total cohort, in the group with BP at  $\geq 3$  and  $< 3$  visits; BP at  $\geq 3$  vs  $< 3$  visits  $p < 0.0001$ : In Centers with BP score indicative of BP measurement methodology (Cohort B), in the total cohort, in the group with BP at  $\geq 3$  and  $< 3$  visits; BP at  $\geq 3$  vs BP at  $< 3$  visits  $p < 0.0001$ . Systolic and diastolic BP were adjusted for age, BMI-SDS and region.

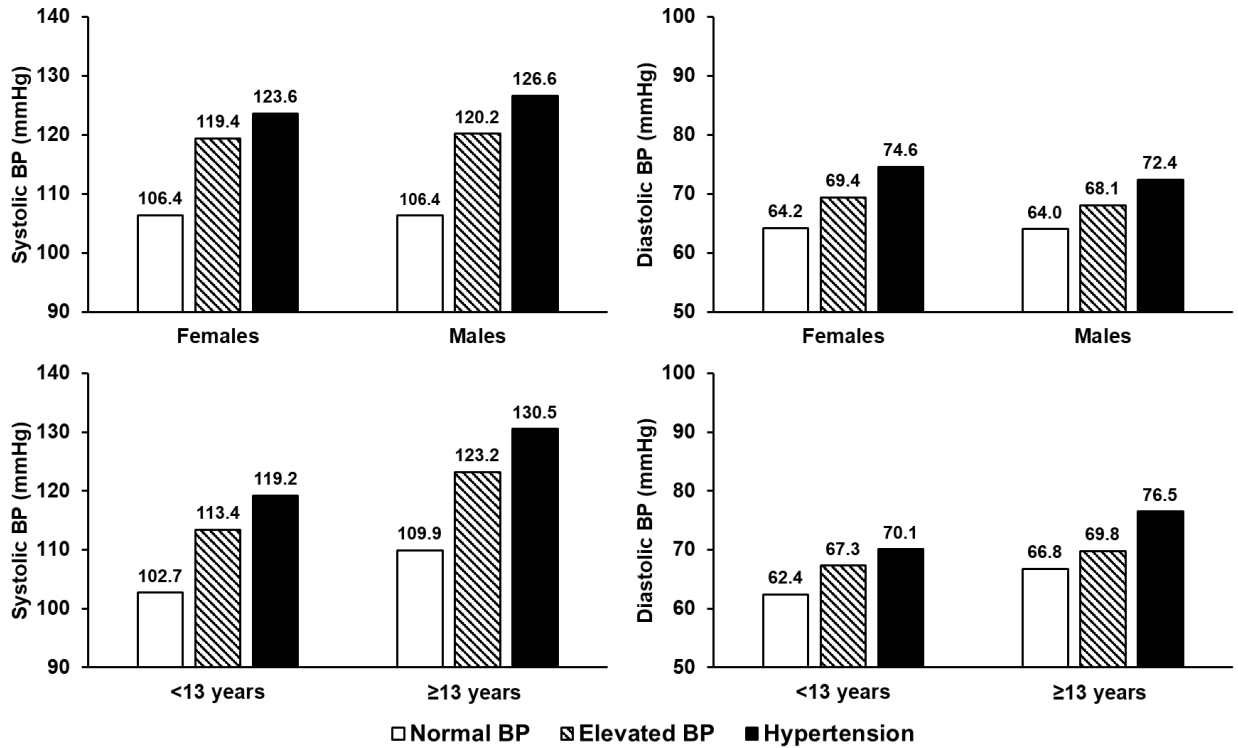

**Supplemental Figure S2.** Median systolic and diastolic BP in cohort A, in the group of participants with  $\geq 3$  measurements per year, according to age and gender stratification. Males had higher systolic BP compared with females ( $p < 0.0001$ ). Patients  $\geq 13$  years of age had higher systolic and diastolic BP compared with those  $< 13$  ( $p < 0.0001$ ). Systolic and diastolic BP were adjusted for BMI-SDS, diabetes duration, HbA1c and region for gender stratification and diabetes duration, HbA1c and region for age stratification.

|                                       | <b>Females<br/>No=5034</b> | <b>Males<br/>No=5406</b>   | <b>Females<br/>vs males</b> | <b>≥13 years<br/>No =5567</b> | <b>&lt;13 years<br/>No= 4873</b> | <b>≥13 vs &lt;13<br/>years</b> |
|---------------------------------------|----------------------------|----------------------------|-----------------------------|-------------------------------|----------------------------------|--------------------------------|
|                                       | Median<br>(LQ UQ)          | Median<br>(LQ UQ)          | p value                     | Median<br>(LQ UQ)             | Median<br>(LQ UQ)                | p value                        |
| <b>Age years</b>                      | 13.3<br>(10.7, 15.5)       | 13.3<br>(10.5, 15.5)       | ns                          | 15.4<br>(14.2,16.6)           | 10.4<br>(8.4, 8.4)               | <0.001                         |
| <b>Disease<br/>duration<br/>years</b> | 4.5<br>(2.2, 7.5)          | 4.3<br>(1.9, 7.4)          | 0.023                       | 5.5<br>(2.8, 9.2)             | 3.36<br>(1.4, 5.7)               | <0.001                         |
| <b>BMI- SDS</b>                       | 0.73<br>(0.1, 1.4)         | 0.52<br>(-0.2, 1.3)        | <0.001                      | 0.66<br>(-0.1, 1.4)           | 0.59<br>(-0.1, 1.3)              | ns                             |
| <b>Height -SDS</b>                    | 0.3<br>(-0.4, 1.0)         | 0.40<br>(-0.3 1.1)         | <0.001                      | 0.3 (-0.4,<br>1.0)            | 0.4<br>(-0.22.<br>1.16)          | <0.001                         |
| <b>HbA1c%</b>                         | 7.9 (7.1,<br>8.9)          | 7.8 (7.1,<br>8.7)          | <0.001                      | 8.0<br>(7.2, 9.1)             | 7.7<br>(7.0, 8.5)                | <0.001                         |
| <b>HbA1c<br/>mmol/mol</b>             | 62.7<br>(54.3, 73.6)       | 61.6<br>(53.8, 71.8)       | <0.001                      | 64.1<br>(55.1, 76.5)          | 60.4<br>(53.0, 69.2)             | <0.001                         |
| <b>Insulin U/kg/d</b>                 | 1.0<br>(0.7- 1.01)         | 0.8<br>(0.6 -1.0)          | <0.001                      | 0.87<br>(0.7, 1.0)            | 0.8<br>(0.6,0.9)                 | <0.001                         |
| <b>Systolic BP<br/>mmHg</b>           | 110.0<br>(103.0<br>117.0)  | 110.0<br>(103.0,<br>119.0) | <0.001                      | 115.0<br>(109.0,<br>122.0)    | 105.0<br>(100.0,<br>111.0)       | <0.001                         |
| <b>Diastolic BP<br/>mmHg</b>          | 67.0<br>(61.5, 71.0)       | 65.5<br>(61.0, 70.0)       | <0.001                      | 69.0<br>(64.0, 73.0)          | 63.0<br>(60.0, 68.0)             | <0.001                         |
| <b>Males %</b>                        |                            |                            |                             | 51.7                          | 51.8                             | ns                             |
| <b>Pump %</b>                         | 55.9                       | 53.4                       | 0.04                        | 52.6                          | 57.0                             | <0.001                         |

**Supplemental Table S1.** Demographic characteristics of patients with BP in ≥ 3 visits stratified by gender and age (≥/ <13 years of age). Unadjusted comparisons between males and females and ≥/ <13 years of age.

|                                               | <b>Model 1 Diastolic BP</b>                                                                                                                                 |          | <b>Model 2 Diastolic BP</b>                                                                                                                              |          | <b>Model 3 Diastolic BP</b>                                                                                                                       |          |
|-----------------------------------------------|-------------------------------------------------------------------------------------------------------------------------------------------------------------|----------|----------------------------------------------------------------------------------------------------------------------------------------------------------|----------|---------------------------------------------------------------------------------------------------------------------------------------------------|----------|
|                                               | <b>No of observations<br/>15742 (15401 used)<br/>Covariates: age, sex,<br/>diabetes duration,<br/>height-SDS, HbA1c,<br/>region, total center<br/>score</b> |          | <b>No of observations<br/>15742 (15384 used)<br/>Covariates: age,<br/>sex, diabetes<br/>duration, BMI-SDS,<br/>HbA1c, region, total<br/>center score</b> |          | <b>No of observations<br/>15742 (15657 used)<br/>Covariates: age,<br/>sex, diabetes<br/>duration, BMI-SDS,<br/>region, total center<br/>score</b> |          |
| <b>Fit statistics</b>                         | <b>AkIC 104862.8</b>                                                                                                                                        |          | <b>AkIC 104391.1</b>                                                                                                                                     |          | <b>AkIC 106601.1</b>                                                                                                                              |          |
| <b>Effect</b>                                 | <b>Estimate<br/>(SE)</b>                                                                                                                                    | <b>p</b> | <b>Estimate<br/>(SE)</b>                                                                                                                                 | <b>p</b> | <b>Estimate<br/>(SE)</b>                                                                                                                          | <b>p</b> |
| <b>Intercept</b>                              | 49.2 (0.6)                                                                                                                                                  | <0.001   | 49.0 (0.6)                                                                                                                                               | <0.001   | 53.5 (0.5)                                                                                                                                        | <0.001   |
| <b>Age</b>                                    | 0.8 (0.02)                                                                                                                                                  | <0.001   | 0.8 (0.02)                                                                                                                                               | <0.001   | 0.8 (0.02)                                                                                                                                        | <0.001   |
| <b>Gender female</b>                          | 0.8 (0.1)                                                                                                                                                   | <0.001   | 0.6 (0.1)                                                                                                                                                | <0.001   | 0.6 (0.1)                                                                                                                                         | <0.001   |
| <b>Gender male</b>                            | 0                                                                                                                                                           |          | 0                                                                                                                                                        |          | 0                                                                                                                                                 |          |
| <b>Disease duration</b>                       | 0.1 (0.02)                                                                                                                                                  | <0.001   | 0.1 (0.02)                                                                                                                                               | <0.001   | 0.1 (0.02)                                                                                                                                        | <0.001   |
| <b>Height-SDS</b>                             | 0.3 (0.1)                                                                                                                                                   | <0.001   |                                                                                                                                                          |          |                                                                                                                                                   |          |
| <b>BMI-SDS</b>                                |                                                                                                                                                             |          | 1.1 (0.05)                                                                                                                                               | <0.001   | 1.0 (0.05)                                                                                                                                        | <0.001   |
| <b>HbA1c</b>                                  | 0.5 (0.03)                                                                                                                                                  | <0.001   | 0.5 (0.03)                                                                                                                                               | <0.001   |                                                                                                                                                   |          |
| <b>Region Europe</b>                          | -1.6 (0.2)                                                                                                                                                  | <0.001   | -2.0 (0.2)                                                                                                                                               | <0.001   | -3.0 (0.2)                                                                                                                                        | <0.001   |
| <b>Region<br/>Australia/NZ</b>                | -5.9 (0.4)                                                                                                                                                  | <0.001   | -6.6 (0.4)                                                                                                                                               | <0.001   | -7.3 (0.4)                                                                                                                                        | <0.001   |
| <b>Region      South<br/>America</b>          | -4.2 (0.5)                                                                                                                                                  | <0.001   | -4.8 (0.5)                                                                                                                                               | <0.001   | -5.6 (0.5)                                                                                                                                        | <0.001   |
| <b>Region      North<br/>America/Canada</b>   | -0.7 (0.2)                                                                                                                                                  | 0.006    | -0.7 (0.2)                                                                                                                                               | <0.001   | -1.6 (0.2)                                                                                                                                        | <0.001   |
| <b>Region<br/>Asia/middle<br/>East/Africa</b> | 0                                                                                                                                                           |          | 0                                                                                                                                                        |          | 0                                                                                                                                                 |          |
| <b>Total Center Score</b>                     | 1.5 (0.2)                                                                                                                                                   | <0.001   | 1.6 (0.15)                                                                                                                                               | <0.001   | 1.5 (0.2)                                                                                                                                         | <0.001   |
| <b>Scale</b>                                  | 52.9 (0.6)                                                                                                                                                  |          | 51.7 (0.6)                                                                                                                                               |          | 52.9 (0.6)                                                                                                                                        |          |

**Supplemental Table S2.** Results of linear regression analysis: Diastolic BP by total center score in 3 different models, after adjusting for multiple variables showing that total center score is an independent determinant of systolic BP after adjustment of multiple co-variables. SE: Standard Error, AkIC: Akaike information criterion
